# Supplementary material
Source: PubMed Central journal article supplement (PMC8068601)
Supplement: NIHMS1675202-supplement-Appendix_Table_1.pdf [file NIHMS1675202-supplement-Appendix_Table_1.pdf]

**Appendix Table 1.** Comparison of the SummerStyles 2018 Sample to the 2017 Census Estimates for Demographic Variables

| <b>Variable</b>                                 | <b>2017<br/>Current<br/>Population<br/>Survey<sup>a</sup><br/>(N=134,958)<br/>%</b> | <b>Unweighted<br/>2018<br/>SummerStyles<br/>Data<br/>(N=4,088)<br/>%</b> | <b>Weighted<br/>2018<br/>SummerStyles<br/>Data<br/>(N=4,088)<br/>%</b> | <b>Final<br/>Sample<br/>for<br/>Analysis<sup>b</sup><br/>(N=3,106)<br/>%</b> |
|-------------------------------------------------|-------------------------------------------------------------------------------------|--------------------------------------------------------------------------|------------------------------------------------------------------------|------------------------------------------------------------------------------|
| <b>Gender</b>                                   |                                                                                     |                                                                          |                                                                        |                                                                              |
| Men                                             | 48.2                                                                                | 49.6                                                                     | 48.3                                                                   | 49.2                                                                         |
| Women                                           | 51.8                                                                                | 50.4                                                                     | 51.7                                                                   | 50.8                                                                         |
| <b>Age, years</b>                               |                                                                                     |                                                                          |                                                                        |                                                                              |
| 18–24                                           | 11.9                                                                                | 4.3                                                                      | 11.8                                                                   | 4.1                                                                          |
| 25–34                                           | 17.9                                                                                | 14.1                                                                     | 17.9                                                                   | 13.7                                                                         |
| 35–44                                           | 16.2                                                                                | 17.7                                                                     | 16.2                                                                   | 18.2                                                                         |
| 45–54                                           | 17.1                                                                                | 18.8                                                                     | 17.1                                                                   | 19.3                                                                         |
| 55–64                                           | 16.8                                                                                | 22.3                                                                     | 16.9                                                                   | 23.2                                                                         |
| ≥65                                             | 20.1                                                                                | 22.8                                                                     | 20.1                                                                   | 21.6                                                                         |
| <b>Region</b>                                   |                                                                                     |                                                                          |                                                                        |                                                                              |
| Northeast                                       | 17.8                                                                                | 18.7                                                                     | 17.8                                                                   | 18.4                                                                         |
| Midwest                                         | 20.9                                                                                | 22.2                                                                     | 20.9                                                                   | 22.9                                                                         |
| South                                           | 37.6                                                                                | 36.7                                                                     | 37.6                                                                   | 35.8                                                                         |
| West                                            | 23.7                                                                                | 22.4                                                                     | 23.7                                                                   | 23.0                                                                         |
| <b>Annual household income</b>                  |                                                                                     |                                                                          |                                                                        |                                                                              |
| <25,000                                         | 15.1                                                                                | 12.8                                                                     | 15.0                                                                   | 10.8                                                                         |
| \$25,000–\$39,999                               | 11.9                                                                                | 11.6                                                                     | 11.9                                                                   | 10.8                                                                         |
| \$40,000–\$59,999                               | 15.3                                                                                | 14.6                                                                     | 15.3                                                                   | 13.8                                                                         |
| ≥\$60,000                                       | 57.7                                                                                | 61.0                                                                     | 57.8                                                                   | 64.6                                                                         |
| <b>Race/Ethnicity</b>                           |                                                                                     |                                                                          |                                                                        |                                                                              |
| White, Non-Hispanic                             | 64.0                                                                                | 74.0                                                                     | 64.1                                                                   | 82.3                                                                         |
| Black, Non-Hispanic                             | 11.8                                                                                | 8.9                                                                      | 11.8                                                                   | 2.5                                                                          |
| 2+ Races, Non-Hispanic                          | 1.3                                                                                 | 3.0                                                                      | 1.3                                                                    | 2.9                                                                          |
| Other, Non-Hispanic                             | 7.0                                                                                 | 4.5                                                                      | 7.0                                                                    | 3.8                                                                          |
| Hispanic                                        | 15.9                                                                                | 9.5                                                                      | 15.8                                                                   | 8.5                                                                          |
| <b>Education</b>                                |                                                                                     |                                                                          |                                                                        |                                                                              |
| Less than high school                           | 11.1                                                                                | 6.1                                                                      | 11.1                                                                   | 4.8                                                                          |
| High school                                     | 28.9                                                                                | 27.9                                                                     | 28.9                                                                   | 25.9                                                                         |
| Some college                                    | 28.6                                                                                | 28.7                                                                     | 28.5                                                                   | 29.1                                                                         |
| Bachelor’s degree or higher                     | 31.4                                                                                | 37.2                                                                     | 31.5                                                                   | 40.2                                                                         |
| <b>Metropolitan statistical area<br/>status</b> |                                                                                     |                                                                          |                                                                        |                                                                              |
| Non-Metro                                       | 13.9                                                                                | 14.6                                                                     | 13.9                                                                   | 15.6                                                                         |
| Metro                                           | 86.1                                                                                | 85.4                                                                     | 86.1                                                                   | 84.4                                                                         |
| <b>Household size</b>                           |                                                                                     |                                                                          |                                                                        |                                                                              |
| 1                                               | 14.4                                                                                | 16.3                                                                     | 14.4                                                                   | 14.9                                                                         |
| 2                                               | 34.6                                                                                | 37.4                                                                     | 34.7                                                                   | 37.6                                                                         |

|    |      |      |      |      |
|----|------|------|------|------|
| 3  | 19.2 | 17.7 | 19.2 | 17.4 |
| 4  | 16.9 | 15.9 | 16.9 | 17.0 |
| ≥5 | 14.9 | 12.6 | 14.8 | 13.1 |

<sup>a</sup>Data are from the 2017 Current Population Survey, which interviews a sample of the U.S. population annually. The sample consists of 69,788 households and 134,958 persons. Weights are then provided to project the data to the U.S. total 126,206,138 million households and 245,122,947 million adults.

<sup>b</sup>Includes only those who could remember their most recent sunburn and whose most recent sunburn was from the sun and not an indoor tanning device.
